# Supplementary material for: The Influence of Ni Addition in the Mechanism of CO2 Electroreduction on Cu Crystals—Mechanistic Insight from DFT Simulations
Source: MDPI journal article supplement (doi:10.3390/ma16145138), 2023-07-21
Supplement: s1 [file s1]

# The Influence of Ni Addition in the Mechanism of CO<sub>2</sub> Electroreduction on Cu Crystals—Mechanistic Insight from DFT Simulations

Elżbieta Dziadyk-Stopyra <sup>1</sup>, Ionut Tranca <sup>2</sup>, Daniel Smykowski <sup>3</sup> and Bartłomiej M. Szyja <sup>1,\*</sup>

<sup>1</sup> Institute of Advanced Materials, Faculty of Chemistry, Wrocław University of Science and Technology, Gdańska 7/9, 50-344 Wrocław, Poland; elzbieta.dziadyk@pwr.edu.pl

<sup>2</sup> Algemene Chemie, Vrije Universiteit Brussel, Pleinlaan 2, B-1050 Brussels, Belgium; ionut.tranca@vub.be

<sup>3</sup> Department of Energy Conversion Engineering, Faculty of Mechanical and Power Engineering, Wrocław University of Science and Technology, Wybrzeże Wyspiańskiego 27, 50-370 Wrocław, Poland; daniel.smykowski@pwr.edu.pl

\* Correspondence: b.m.szyja@pwr.edu.pl; Tel.: +48-71-320-6370

## Contents

|    |                                                             |   |
|----|-------------------------------------------------------------|---|
| S1 | Structures of the optimized intermediates . . . . .         | 2 |
| S2 | Energy components of the intermediates . . . . .            | 5 |
| S3 | Partial charges on the atoms of the intermediates . . . . . | 8 |
| S4 | Sum of Bond Orders . . . . .                                | 9 |

## S1 Structures of the optimized intermediates

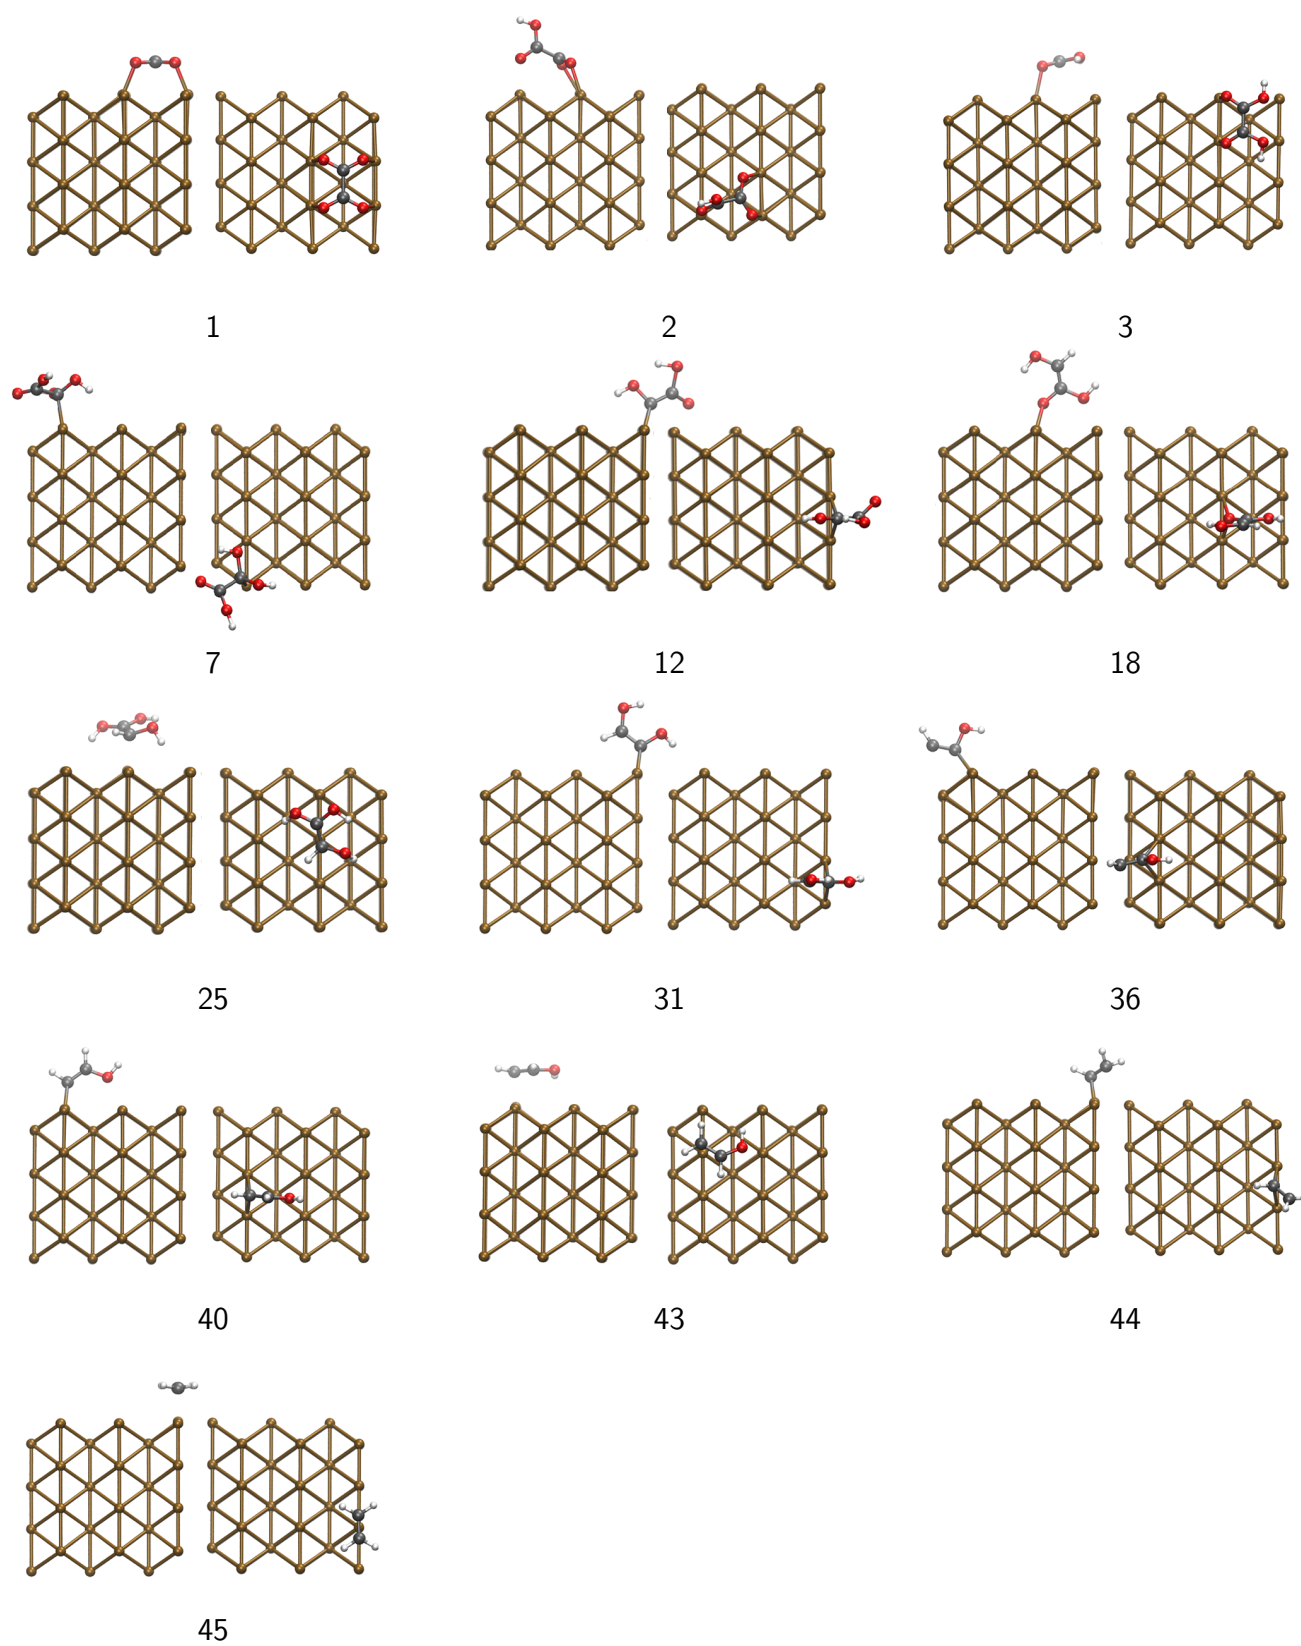

Figure S1: Side and top views of structures of the optimized intermediates on a pure Cu surface.

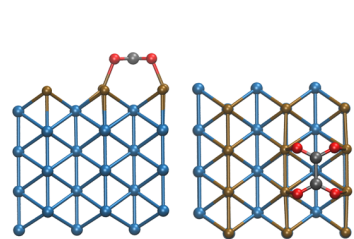

1

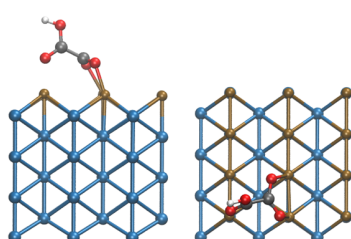

2

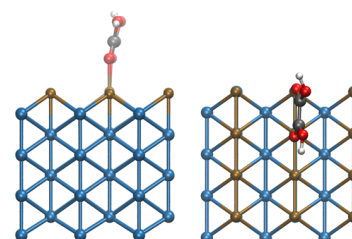

3

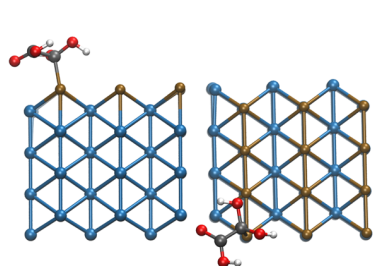

7

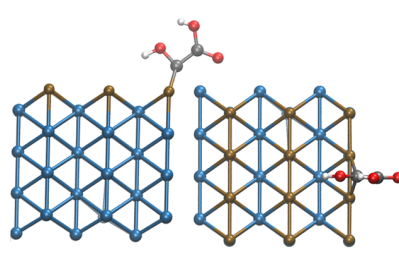

12

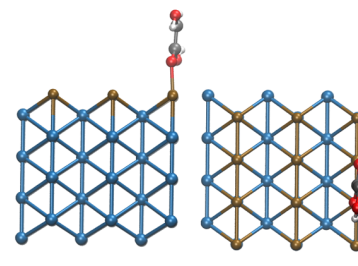

18

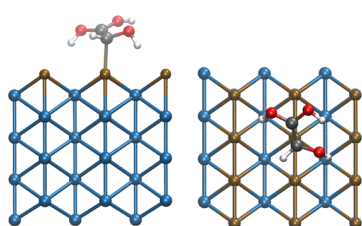

25

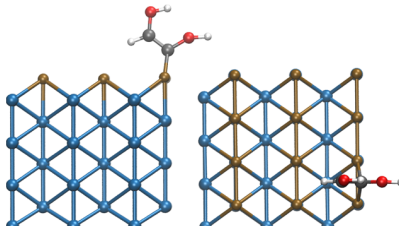

31

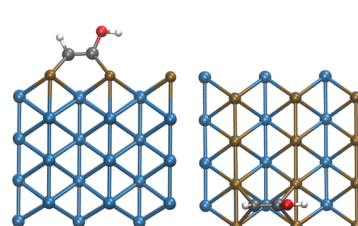

36

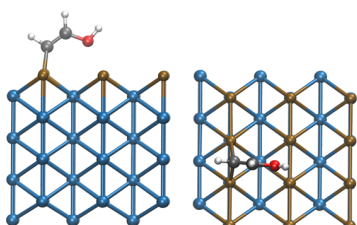

40

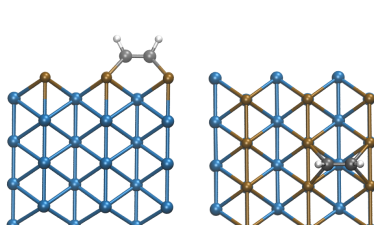

42

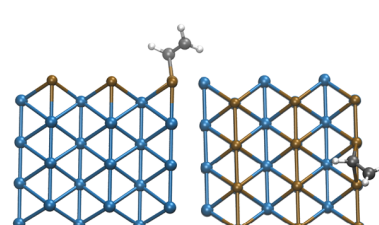

44

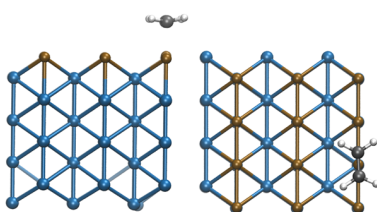

45

Figure S2: Side and top views of structures of the optimized intermediates on the 1 overlayer Cu surface

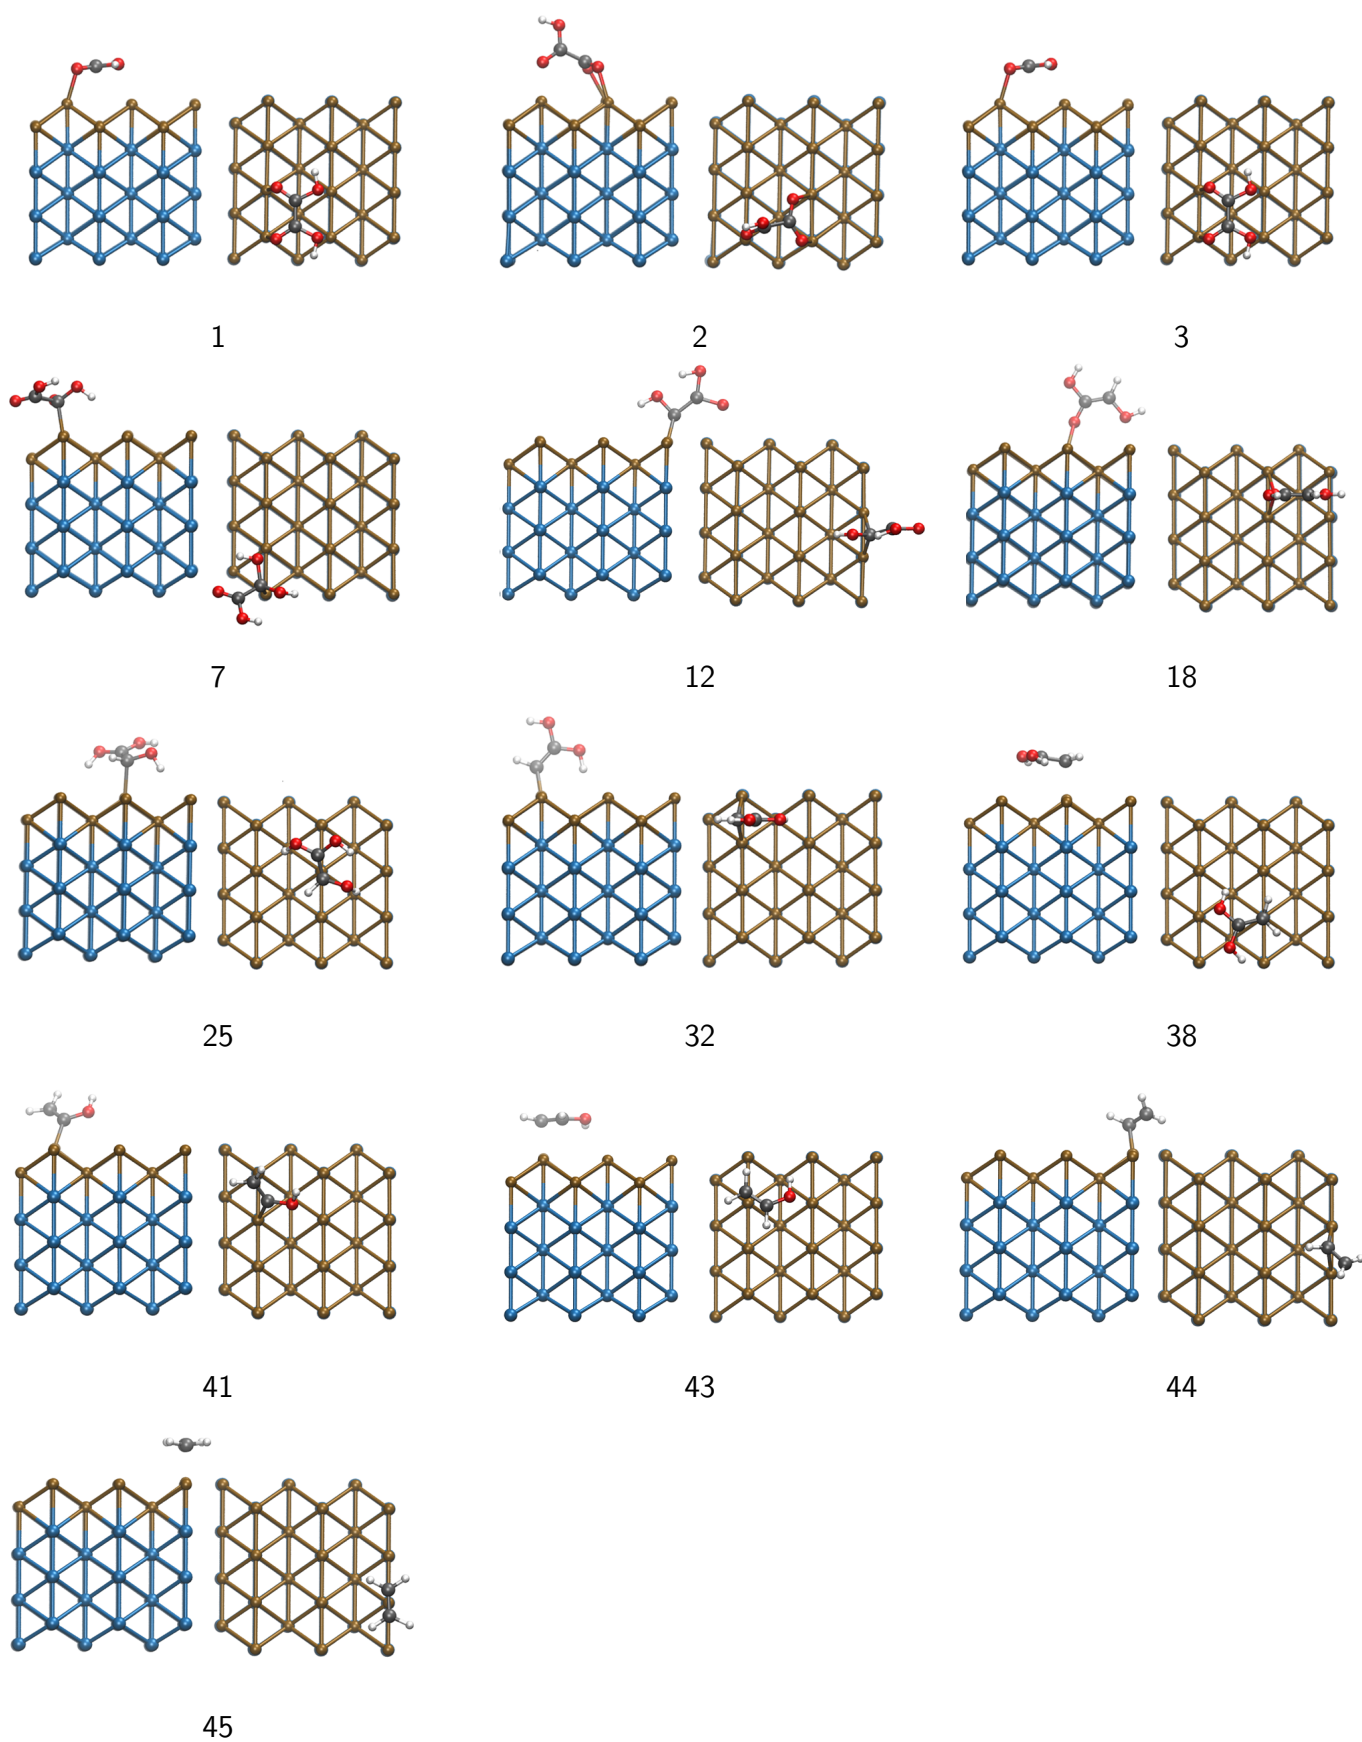

Figure S3: Side and top views of structures of the optimized intermediates on the 2 overlayers Cu surface

## S2 Energy components of the intermediates

Table S1: Energy components of the optimized intermediates on the pure Cu surface

| System | DFT Energy | ZPE  | Solvation | System | DFT Energy | ZPE  | Solvation |
|--------|------------|------|-----------|--------|------------|------|-----------|
| 1      | −427.91    | 3.72 | −428.24   | 31     | −423.69    | 4.40 | −423.85   |
| 2      | −431.53    | 4.05 | −431.90   | 32     | −424.01    | 4.40 | −424.28   |
| 3      | −434.64    | 4.31 | −434.97   | 33     | −424.94    | 4.39 | −425.11   |
| 4      | −434.56    | 4.29 | −434.88   | 34     | −413.66    | 3.97 | −413.69   |
| 5      | −419.95    | 3.59 | −420.12   | 35     | −427.63    | 4.52 | −427.82   |
| 6      | −423.48    | 3.87 | −423.64   | 36     | −411.91    | 3.95 | −412.89   |
| 7      | −438.26    | 4.63 | −438.54   | 37     | −413.26    | 3.95 | −413.30   |
| 8      | −423.48    | 3.89 | −423.65   | 38     | −427.89    | 4.68 | −428.12   |
| 9      | n/a        | n/a  | n/a       | 39     | −417.63    | 4.27 | −417.67   |
| 10     | −412.88    | 3.41 | −412.91   | 40     | −416.70    | 4.27 | −417.04   |
| 11     | −427.50    | 4.18 | −427.79   | 41     | −416.67    | 4.26 | −416.84   |
| 12     | −427.50    | 4.21 | −427.69   | 42     | −405.65    | 3.80 | −405.65   |
| 13     | −427.83    | 4.19 | −428.05   | 43     | −420.78    | 4.57 | −420.93   |
| 14     | −440.68    | 4.93 | −441.44   | 44     | −409.73    | 4.13 | −409.75   |
| 15     | −427.15    | 4.22 | −427.30   | 45     | −413.94    | 4.45 | −413.99   |
| 16     | −415.85    | 3.74 | −415.93   |        |            |      |           |
| 17     | −415.79    | 3.74 | −416.00   |        |            |      |           |
| 18     | n/a        | n/a  | n/a       |        |            |      |           |
| 19     | −430.71    | 4.48 | −430.89   |        |            |      |           |
| 20     | −416.40    | 3.77 | −416.87   |        |            |      |           |
| 21     | −430.65    | 4.51 | −431.02   |        |            |      |           |
| 22     | −419.92    | 4.03 | −420.06   |        |            |      |           |
| 23     | −420.19    | 4.05 | −420.32   |        |            |      |           |
| 24     | −419.84    | 4.07 | −420.00   |        |            |      |           |
| 25     | −434.52    | 4.80 | −434.70   |        |            |      |           |
| 26     | −420.80    | 4.11 | −421.04   |        |            |      |           |
| 27     | −421.38    | 4.10 | −421.49   |        |            |      |           |
| 28     | −420.36    | 4.09 | −419.88   |        |            |      |           |
| 29     | −424.31    | 4.37 | −424.39   |        |            |      |           |
| 30     | −409.56    | 3.65 | −409.61   |        |            |      |           |

Table S2: Energy components of the optimized intermediates on the 1 overlayer Cu surface

| System | DFT Energy | ZPE  | Solvation | System | DFT Energy | ZPE  | Solvation |
|--------|------------|------|-----------|--------|------------|------|-----------|
| 1      | −560.17    | 4.05 | −560.59   | 31     | −556.10    | 4.72 | −556.74   |
| 2      | −563.95    | 4.39 | −564.34   | 32     | −556.43    | 4.73 | −556.74   |
| 3      | −566.90    | 4.46 | −567.53   | 33     | −557.32    | 4.72 | −557.55   |
| 4      | −566.96    | 4.62 | −567.32   | 34     | −545.92    | 4.29 | −546.00   |
| 5      | −552.34    | 3.91 | −552.61   | 35     | −560.10    | 5.02 | −560.29   |
| 6      | −555.96    | 4.23 | −556.16   | 36     | −545.16    | 4.27 | −545.35   |
| 7      | −570.67    | 4.97 | −570.99   | 37     | −545.61    | 4.28 | −545.71   |
| 8      | −556.07    | 4.25 | −556.26   | 38     | −560.40    | 5.01 | −560.68   |
| 9      | n/a        | n/a  | n/a       | 39     | −550.03    | 4.60 | −550.11   |
| 10     | −545.54    | 3.76 | −545.62   | 40     | −549.12    | 4.60 | −549.49   |
| 11     | −559.84    | 4.53 | −560.20   | 41     | −549.09    | 4.59 | −549.31   |
| 12     | −559.77    | 4.54 | −560.00   | 42     | −538.14    | 4.13 | −538.19   |
| 13     | −560.10    | 4.83 | −560.35   | 43     | −553.35    | 4.90 | −553.53   |
| 14     | −573.20    | 5.26 | −574.01   | 44     | −542.17    | 4.48 | −542.23   |
| 15     | −560.10    | 4.83 | −560.35   | 45     | −546.52    | 4.80 | −546.60   |
| 16     | −547.93    | 4.08 | −548.18   |        |            |      |           |
| 17     | −548.22    | 4.09 | −548.44   |        |            |      |           |
| 18     | n/a        | n/a  | n/a       |        |            |      |           |
| 19     | −563.15    | 4.82 | −563.36   |        |            |      |           |
| 20     | −548.64    | 4.74 | −549.14   |        |            |      |           |
| 21     | −562.99    | 4.83 | −563.43   |        |            |      |           |
| 22     | −552.34    | 4.37 | −552.52   |        |            |      |           |
| 23     | −552.45    | 4.39 | −552.62   |        |            |      |           |
| 24     | −552.29    | 4.41 | −552.50   |        |            |      |           |
| 25     | −567.07    | 5.13 | −567.30   |        |            |      |           |
| 26     | −553.05    | 4.44 | −553.33   |        |            |      |           |
| 27     | −553.65    | 4.43 | −553.81   |        |            |      |           |
| 28     | −552.03    | 4.41 | −552.30   |        |            |      |           |
| 29     | −556.69    | 4.70 | −556.82   |        |            |      |           |
| 30     | −541.95    | 3.99 | −542.04   |        |            |      |           |

Table S3: Energy components of the optimized intermediates on the 2 overlayers Cu surface

| System | DFT Energy | ZPE  | Solvation | System | DFT Energy | ZPE  | Solvation |
|--------|------------|------|-----------|--------|------------|------|-----------|
| 1      | −541.37    | 4.03 | −542.04   | 31     | −536.91    | 4.69 | −537.40   |
| 2      | −544.86    | 4.36 | −545.58   | 32     | −537.58    | 4.28 | −538.01   |
| 3      | −547.86    | 4.60 | −548.56   | 33     | −538.20    | 4.69 | −538.74   |
| 4      | −547.77    | 4.66 | −548.43   | 34     | −526.87    | 4.26 | −527.24   |
| 5      | −533.34    | 3.89 | −533.86   | 35     | −540.75    | 4.98 | −541.27   |
| 6      | −536.48    | 4.18 | −537.17   | 36     | −525.97    | 4.24 | −526.46   |
| 7      | −551.57    | 4.93 | −552.18   | 37     | −526.50    | 4.98 | −526.88   |
| 8      | −536.80    | 4.19 | −537.30   | 38     | −541.06    | 4.97 | −541.66   |
| 9      | n/a        | n/a  | n/a       | 39     | −530.91    | 4.56 | −531.31   |
| 10     | −526.28    | 3.71 | −526.66   | 40     | −529.91    | 4.57 | −530.62   |
| 11     | −540.84    | 4.50 | −541.50   | 41     | −529.93    | 4.56 | −530.45   |
| 12     | −540.76    | 4.52 | −541.30   | 42     | −518.87    | 4.10 | −519.22   |
| 13     | −541.18    | 4.51 | −541.73   | 43     | −534.00    | 4.86 | −534.51   |
| 14     | −553.86    | 5.22 | −555.04   | 44     | −522.97    | 4.43 | −523.34   |
| 15     | −540.34    | 4.52 | −540.83   | 45     | −527.18    | 4.75 | −527.59   |
| 16     | −528.77    | 4.04 | −529.32   |        |            |      |           |
| 17     | −529.03    | 4.06 | −529.57   |        |            |      |           |
| 18     | n/a        | n/a  | n/a       |        |            |      |           |
| 19     | −543.95    | 4.79 | −544.45   |        |            |      |           |
| 20     | −529.70    | 4.74 | −530.50   |        |            |      |           |
| 21     | −543.76    | 4.50 | −544.62   |        |            |      |           |
| 22     | −533.28    | 4.34 | −533.78   |        |            |      |           |
| 23     | −533.41    | 4.36 | −533.89   |        |            |      |           |
| 24     | −533.11    | 4.37 | −533.61   |        |            |      |           |
| 25     | −547.72    | 5.07 | −548.25   |        |            |      |           |
| 26     | −534.04    | 4.41 | −534.61   |        |            |      |           |
| 27     | −534.74    | 4.41 | −535.20   |        |            |      |           |
| 28     | −532.89    | 4.38 | −533.47   |        |            |      |           |
| 29     | −537.58    | 4.28 | −538.01   |        |            |      |           |
| 30     | −522.81    | 3.96 | −523.19   |        |            |      |           |

### S3 Partial charges on the atoms of the intermediates

Table S4: DDEC6 partial charges on the atoms of the intermediates on the pure Cu surface. The last column is the total charge on the intermediate.

|     | C 1   | C 2   | O 1   | O 2   | O 3   | O 4   | H 1  | H 2  | H 3  | H 4  | $\Sigma$ |
|-----|-------|-------|-------|-------|-------|-------|------|------|------|------|----------|
| 01E | 0.46  | 0.46  | -0.41 | -0.41 | -0.41 | -0.41 | n/a  | n/a  | n/a  | n/a  | -0.73    |
| 02E | 0.52  | 0.46  | -0.42 | -0.41 | -0.40 | -0.42 | 0.40 | n/a  | n/a  | n/a  | -0.28    |
| 03D | 0.40  | 0.40  | -0.40 | -0.39 | -0.40 | -0.39 | 0.36 | 0.36 | n/a  | n/a  | -0.07    |
| 07C | 0.14  | 0.47  | -0.43 | -0.43 | -0.47 | -0.39 | 0.35 | 0.33 | 0.37 | n/a  | -0.05    |
| 12A | 0.52  | -0.24 | -0.42 | -0.39 | -0.43 | n/a   | 0.39 | 0.34 | n/a  | n/a  | -0.24    |
| 18A | -0.16 | 0.35  | -0.40 | -0.41 | -0.37 | n/a   | 0.11 | 0.38 | 0.35 | n/a  | -0.17    |
| 25E | -0.19 | 0.52  | -0.41 | -0.41 | -0.41 | n/a   | 0.12 | 0.28 | 0.38 | 0.31 | 0.20     |
| 31A | 0.11  | -0.11 | -0.41 | -0.36 | n/a   | n/a   | 0.07 | 0.38 | 0.30 | n/a  | -0.03    |
| 36A | 0.13  | -0.42 | -0.37 | n/a   | n/a   | n/a   | 0.16 | 0.34 | n/a  | n/a  | -0.15    |
| 40A | 0.20  | -0.48 | -0.35 | n/a   | n/a   | n/a   | 0.15 | 0.07 | 0.37 | n/a  | -0.05    |
| 43A | -0.43 | 0.24  | -0.35 | n/a   | n/a   | n/a   | 0.17 | 0.33 | 0.09 | 0.17 | 0.22     |
| 44A | -0.20 | -0.30 | n/a   | n/a   | n/a   | n/a   | 0.13 | 0.13 | 0.11 | n/a  | -0.12    |
| 45A | -0.23 | -0.23 | n/a   | n/a   | n/a   | n/a   | 0.14 | 0.14 | 0.14 | 0.14 | 0.10     |

Table S5: DDEC6 partial charges on the atoms of the intermediates on the Ni surface with 1 Cu overlayer. The last column is the total charge on the intermediate.

|     | C 1   | C 2   | O 1   | O 2   | O 3   | O 4   | H 1  | H 2  | H 3  | H 4  | $\Sigma$ |
|-----|-------|-------|-------|-------|-------|-------|------|------|------|------|----------|
| 01E | 0.46  | 0.46  | -0.42 | -0.42 | -0.42 | -0.42 | n/a  | n/a  | n/a  | n/a  | -0.77    |
| 02E | 0.52  | 0.46  | -0.43 | -0.42 | -0.41 | -0.42 | 0.40 | n/a  | n/a  | n/a  | -0.31    |
| 03D | 0.43  | 0.43  | -0.43 | -0.41 | -0.43 | -0.41 | 0.39 | 0.39 | n/a  | n/a  | -0.04    |
| 07C | 0.13  | 0.48  | -0.43 | -0.44 | -0.47 | -0.40 | 0.36 | 0.34 | 0.37 | n/a  | -0.06    |
| 12A | 0.53  | -0.24 | -0.41 | -0.40 | -0.43 | n/a   | 0.39 | 0.35 | n/a  | n/a  | -0.22    |
| 18A | -0.14 | 0.41  | -0.45 | -0.44 | -0.35 | n/a   | 0.11 | 0.38 | 0.36 | n/a  | -0.12    |
| 25E | -0.20 | 0.52  | -0.41 | -0.41 | -0.41 | n/a   | 0.13 | 0.28 | 0.38 | 0.31 | 0.19     |
| 31A | 0.10  | -0.11 | -0.41 | -0.36 | n/a   | n/a   | 0.08 | 0.38 | 0.30 | n/a  | -0.03    |
| 36A | 0.13  | -0.42 | -0.37 | n/a   | n/a   | n/a   | 0.17 | 0.35 | n/a  | n/a  | -0.15    |
| 40A | 0.20  | -0.49 | -0.36 | n/a   | n/a   | n/a   | 0.15 | 0.07 | 0.37 | n/a  | -0.06    |
| 42A | -0.26 | -0.26 | n/a   | n/a   | n/a   | n/a   | 0.15 | 0.15 | n/a  | n/a  | -0.22    |
| 44A | -0.20 | -0.30 | n/a   | n/a   | n/a   | n/a   | 0.13 | 0.14 | 0.11 | n/a  | -0.12    |
| 45A | -0.24 | -0.24 | n/a   | n/a   | n/a   | n/a   | 0.14 | 0.14 | 0.14 | 0.14 | 0.09     |

Table S6: DDEC6 partial charges on the atoms of the intermediates on the Ni surface with 2 Cu overlayers. The last column is the total charge on the intermediate.

|     | C 1   | C 2   | O 1   | O 2   | O 3   | O 4   | H 1  | H 2  | H 3  | H 4   | $\Sigma$ |
|-----|-------|-------|-------|-------|-------|-------|------|------|------|-------|----------|
| 01E | 0.46  | 0.46  | -0.41 | -0.41 | -0.41 | -0.41 | n/a  | n/a  | n/a  | n/a   | -0.73    |
| 02E | 0.52  | 0.46  | -0.42 | -0.41 | -0.40 | -0.42 | 0.40 | n/a  | n/a  | n/a   | -0.28    |
| 03F | 0.36  | 0.36  | -0.40 | -0.39 | -0.40 | -0.39 | 0.37 | 0.37 | n/a  | n/a   | -0.14    |
| 07C | 0.13  | 0.48  | -0.43 | -0.43 | -0.47 | -0.39 | 0.33 | 0.37 | 0.36 | n/a   | -0.04    |
| 12A | 0.53  | -0.24 | -0.42 | -0.39 | -0.43 | n/a   | 0.39 | 0.35 | n/a  | n/a   | -0.23    |
| 18D | -0.26 | 0.46  | -0.40 | -0.49 | -0.28 | n/a   | 0.10 | 0.37 | 0.36 | n/a   | -0.15    |
| 25E | -0.20 | 0.52  | -0.41 | -0.41 | -0.41 | n/a   | 0.13 | 0.28 | 0.38 | 0.314 | 0.21     |
| 32A | 0.61  | -0.69 | -0.44 | -0.41 | n/a   | n/a   | 0.14 | 0.29 | 0.39 | n/a   | -0.12    |
| 38A | 0.61  | -0.62 | -0.42 | -0.41 | n/a   | n/a   | 0.19 | 0.35 | 0.34 | 0.188 | 0.24     |
| 41B | -0.43 | 0.12  | -0.38 | n/a   | n/a   | n/a   | 0.16 | 0.14 | 0.35 | n/a   | -0.04    |
| 43A | -0.42 | 0.24  | -0.35 | n/a   | n/a   | n/a   | 0.17 | 0.32 | 0.09 | 0.175 | 0.23     |
| 44A | -0.21 | -0.29 | n/a   | n/a   | n/a   | n/a   | 0.13 | 0.13 | 0.11 | n/a   | -0.13    |
| 45A | -0.23 | -0.23 | n/a   | n/a   | n/a   | n/a   | 0.14 | 0.14 | 0.14 | 0.142 | 0.10     |

## S4 Sum of Bond Orders

Table S7: Cu surface

|     | C 1  | C 2  | O 1  | O 2  | O 3  | O 4  | H 1  | H 2  | H 3  | H 4  | C-C BO |
|-----|------|------|------|------|------|------|------|------|------|------|--------|
| 01E | 4.12 | 4.12 | 2.35 | 2.35 | 2.34 | 2.34 | n/a  | n/a  | n/a  | n/a  | 0.78   |
| 02E | 4.03 | 4.21 | 2.36 | 2.34 | 2.34 | 2.22 | 0.82 | n/a  | n/a  | n/a  | 0.83   |
| 03D | 4.12 | 4.12 | 2.32 | 2.37 | 2.32 | 2.37 | 0.88 | 0.88 | n/a  | n/a  | 1.02   |
| 07C | 4.00 | 4.13 | 2.25 | 2.35 | 2.29 | 2.38 | 0.90 | 0.96 | 0.88 | n/a  | 1.02   |
| 12A | 4.08 | 4.04 | 2.35 | 2.48 | 2.19 | n/a  | 0.88 | 0.94 | n/a  | n/a  | 1.24   |
| 18B | 4.14 | 4.24 | 2.57 | 2.50 | 2.31 | n/a  | 1.01 | 0.85 | 0.90 | n/a  | 1.60   |
| 25E | 4.07 | 4.07 | 2.24 | 2.32 | 2.35 | n/a  | 1.00 | 1.05 | 0.88 | 0.99 | 1.24   |
| 31A | 3.99 | 4.13 | 2.37 | 2.26 | n/a  | n/a  | 1.04 | 0.86 | 1.02 | n/a  | 1.46   |
| 36A | 3.94 | 3.88 | 2.29 | n/a  | n/a  | n/a  | 0.98 | 0.90 | n/a  | n/a  | 1.47   |
| 40A | 3.99 | 4.08 | 2.52 | n/a  | n/a  | n/a  | 1.01 | 0.98 | 0.86 | n/a  | 1.72   |
| 43A | 3.93 | 3.97 | 2.39 | n/a  | n/a  | n/a  | 1.01 | 0.93 | 0.97 | 0.99 | 1.53   |
| 44A | 3.86 | 3.96 | n/a  | n/a  | n/a  | n/a  | 1.01 | 0.98 | 1.06 | n/a  | 1.69   |
| 45A | 3.89 | 3.89 | n/a  | n/a  | n/a  | n/a  | 1.00 | 1.00 | 1.00 | 1.00 | 1.51   |

Table S8: Ni surface with 1 Cu overlayer

|     | C 1  | C 2  | O 1  | O 2  | O 3  | O 4  | H 1  | H 2  | H 3  | H 4  | C-C BO |
|-----|------|------|------|------|------|------|------|------|------|------|--------|
| 01E | 4.12 | 4.12 | 2.34 | 2.34 | 2.34 | 2.34 | n/a  | n/a  | n/a  | n/a  | 0.77   |
| 02E | 4.03 | 4.22 | 2.36 | 2.34 | 2.34 | 2.22 | 0.82 | n/a  | n/a  | n/a  | 0.83   |
| 03D | 4.11 | 4.11 | 2.23 | 2.53 | 2.23 | 2.52 | 0.84 | 0.84 | n/a  | n/a  | 0.99   |
| 07C | 4.00 | 4.13 | 2.25 | 2.35 | 2.29 | 2.37 | 0.89 | 0.95 | 0.88 | n/a  | 1.01   |
| 12A | 4.08 | 4.01 | 2.36 | 2.47 | 2.18 | n/a  | 0.88 | 0.92 | n/a  | n/a  | 1.22   |
| 18A | 4.03 | 4.28 | 2.45 | 2.55 | 2.30 | n/a  | 1.01 | 0.85 | 0.88 | n/a  | 1.47   |
| 25E | 4.09 | 4.07 | 2.23 | 2.31 | 2.34 | n/a  | 0.99 | 1.04 | 0.87 | 0.99 | 1.24   |
| 31A | 3.99 | 4.15 | 2.37 | 2.26 | n/a  | n/a  | 1.04 | 0.86 | 1.02 | n/a  | 1.47   |
| 36A | 3.95 | 3.90 | 2.28 | n/a  | n/a  | n/a  | 0.97 | 0.90 | n/a  | n/a  | 1.48   |
| 40A | 4.00 | 4.09 | 2.52 | n/a  | n/a  | n/a  | 1.01 | 0.98 | 0.86 | n/a  | 1.73   |
| 42A | 3.94 | 3.94 | n/a  | n/a  | n/a  | n/a  | 0.97 | 0.97 | n/a  | n/a  | 1.66   |
| 44A | 3.86 | 3.97 | n/a  | n/a  | n/a  | n/a  | 1.01 | 0.98 | 1.06 | n/a  | 1.70   |
| 45A | 3.89 | 3.89 | n/a  | n/a  | n/a  | n/a  | 1.00 | 1.00 | 1.00 | 1.00 | 1.52   |

Table S9: Ni surface with 2 Cu overlayers

|     | C 1  | C 2  | O 1  | O 2  | O 3  | O 4  | H 1  | H 2  | H 3  | H 4  | C-C BO |
|-----|------|------|------|------|------|------|------|------|------|------|--------|
| 01E | 4.12 | 4.12 | 2.34 | 2.34 | 2.34 | 2.34 | n/a  | n/a  | n/a  | n/a  | 0.77   |
| 02E | 4.03 | 4.22 | 2.35 | 2.34 | 2.35 | 2.22 | 0.82 | n/a  | n/a  | n/a  | 0.83   |
| 03F | 4.13 | 4.13 | 2.35 | 2.35 | 2.35 | 2.35 | 0.87 | 0.87 | n/a  | n/a  | 1.11   |
| 07C | 3.99 | 4.13 | 2.24 | 2.35 | 2.29 | 2.37 | 0.89 | 0.95 | 0.88 | n/a  | 1.01   |
| 12A | 4.07 | 4.02 | 2.35 | 2.46 | 2.19 | n/a  | 0.88 | 0.92 | n/a  | n/a  | 1.23   |
| 18D | 3.98 | 4.28 | 2.58 | 2.21 | 2.63 | n/a  | 1.05 | 0.88 | 0.86 | n/a  | 1.56   |
| 25E | 4.08 | 4.06 | 2.23 | 2.31 | 2.33 | n/a  | 0.99 | 1.04 | 0.88 | 0.98 | 1.23   |
| 32A | 4.10 | 4.10 | 2.18 | 2.28 | n/a  | n/a  | 1.07 | 1.03 | 0.85 | n/a  | 1.49   |
| 38A | 4.06 | 3.99 | 2.29 | 2.30 | n/a  | n/a  | 0.99 | 0.91 | 0.93 | 1.00 | 1.41   |
| 41B | 3.96 | 3.94 | 2.41 | n/a  | n/a  | n/a  | 1.03 | 1.01 | 0.87 | n/a  | 1.52   |
| 43A | 3.93 | 3.97 | 2.38 | n/a  | n/a  | n/a  | 1.00 | 0.94 | 0.97 | 0.99 | 1.52   |
| 44A | 3.88 | 3.94 | n/a  | n/a  | n/a  | n/a  | 1.01 | 0.99 | 1.06 | n/a  | 1.67   |
| 45A | 3.89 | 3.89 | n/a  | n/a  | n/a  | n/a  | 1.00 | 1.00 | 1.00 | 1.00 | 1.51   |
